# Supplementary material for: Electrochemical detection of nucleic acids using pentaferrocenyl phosphoramidate α-oligonucleotides
Source: Royal Society of Chemistry journal article supplement (doi:10.1039/c0nj00902d), 2011-01-01
Supplement: c0nj00902d.pdf [file c0nj00902d.pdf]

## Supporting information

### Electrochemical detection of nucleic acids using pentaferrocenyl phosphoramidate $\alpha$ -oligonucleotides

Grégory Chatelain<sup>a</sup>, Albert Meyer<sup>a</sup>, François Morvan<sup>\*b</sup>, Jean-Jacques Vasseur<sup>b</sup>, Carole Chaix<sup>\*a</sup>

<sup>a</sup> Laboratoire des Sciences Analytiques, UMR 5180 CNRS-Université Lyon 1, Université de Lyon, 43, Bd du 11 Nov. 1918, 69622 Villeurbanne Cedex, France

E-mail : carole.chaix-bauvais@univ-lyon1.fr

<sup>b</sup> Institut des Biomolécules Max Mousseron (IBMM), UMR 5247 CNRS - Université Montpellier 1 - Université Montpellier 2, Place Eugène Bataillon, CC1704, 34095 Montpellier Cedex 5, France

E-mail : morvan@univ-montp2.fr

#### Synthetic route for the preparation of the ferrocenyl monomers 2a, b and 6:

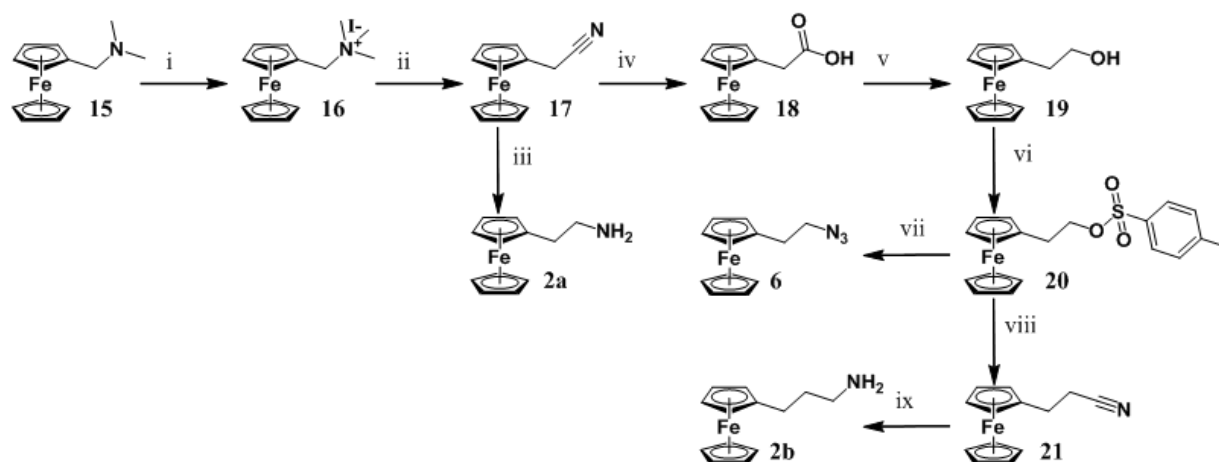

**Scheme S1** Synthetic route for the preparation of the ferrocenyl monomers **2a**, **b** and **6**. i) MeI, MeOH, rt, ii) NaCN, H<sub>2</sub>O, reflux, iii) LiAlH<sub>4</sub>, Et<sub>2</sub>O, reflux, iv) KOH, EtOH, rt, v) LiAlH<sub>4</sub>, THF, reflux, vi) *p*-TsCl, Py, CH<sub>2</sub>Cl<sub>2</sub>, 0°C, vii) NaN<sub>3</sub>, H<sub>2</sub>O, MeCN, reflux, viii) NaCN, H<sub>2</sub>O, MeCN, reflux, ix) LiAlH<sub>4</sub>, Et<sub>2</sub>O, reflux.

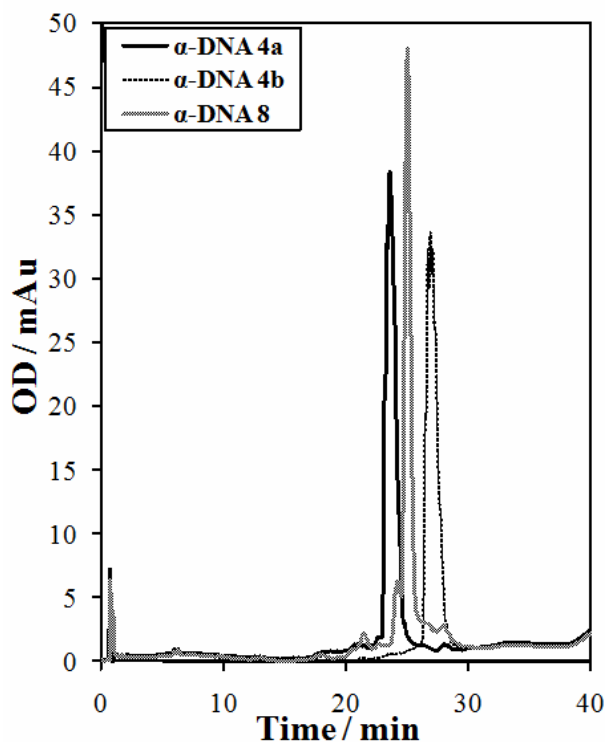

**Fig. S1** HPLC spectra of Fc<sub>5</sub>-α-DNAs **4a** (solid line), **4b** (dashed line) and **8** (hashed line) after purification. Analyses were achieved on a X-terra MS C18 2.5 μm column at 60°C using a linear gradient of acetonitrile from 12% to 64% in 30 min, then 64 % for 5 min and finally 64% to 80% in 5 min at 1 mL/min in TEAAc 50 mM pH 7.

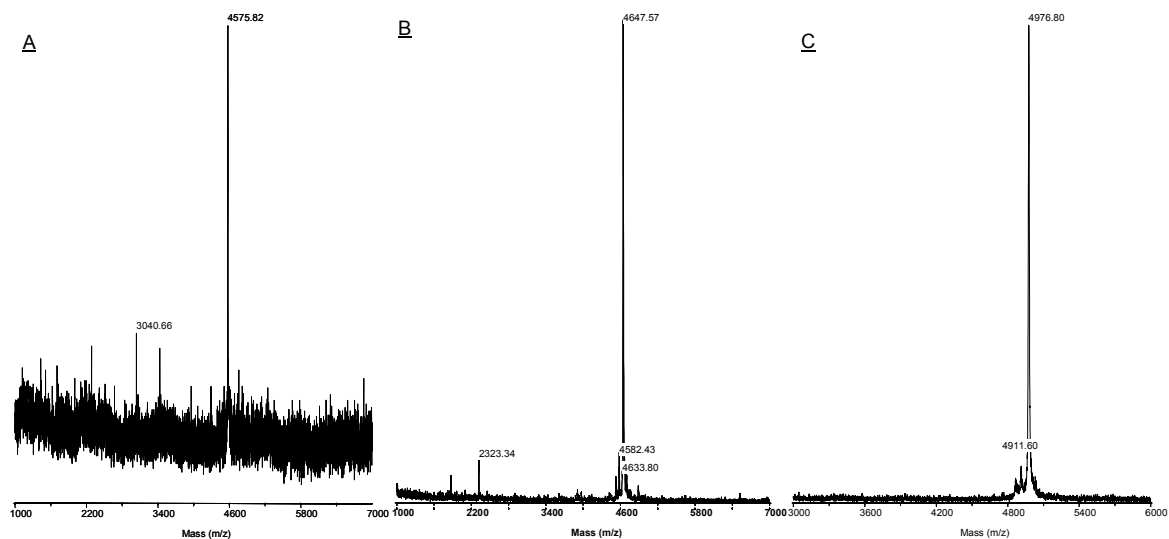

**Fig. S2** MALDI TOF MS of the purified Fc<sub>5</sub>-α-DNAs **4a** (A), **4b** (B) and **8** (C) (2,4,6-trihydroxyacetophenone (THAP) as matrix).

**Table S1** Non modified DNA sequences used for the thermodynamic and electrochemical experiments

| DNA | Anomeric configuration | Sequence 5'→3'       | Linkage |
|-----|------------------------|----------------------|---------|
| 9   | $\alpha$               | TTCTCCTTCTTT         | PO      |
| 10  | $\beta$                | AAGAGGAAGAAA         | PO      |
| 11  | $\beta$                | TTTCTTCCTCTT         | PO      |
| 12  | $\beta$                | ATTGAGATTCCCGAGATTGA | PO      |

## Thermodynamic parameter determination

**Thermodynamic parameter calculation ( $T_m$ ,  $\Delta S^\circ$ ,  $\Delta H^\circ$  and  $\Delta G^\circ_{298}$ ):** Dissociation constants ( $K(T)$ ) were calculated for Fc<sub>5</sub>- $\alpha$ -DNA/target duplexes as described by Marky et al.<sup>1</sup> and Durand et al.<sup>2</sup>. For this analysis, it is first necessary to cast raw optical data into the fraction of the single strand and duplex state at each temperature  $\alpha(T)$ , for Fc<sub>5</sub>- $\alpha$ -ON/target binding experiments. To accomplish this, upper and lower absorption baselines ( $A_U$  and  $A_L$ ) were determined by calculating the absorbance derivative ( $dA/dT$ ).  $A_U$  and  $A_L$  values corresponded to both  $dA/dT$  minimums of the curve. Next, the bound fraction parameter  $\alpha(T)$  was computed for each temperature ( $T$ ) according to equation 1:

$$\alpha(T) = (A_U - A(T)) / (A_U - A_L) \quad (1)$$

where  $A(T)$  is the absorbance at the temperature  $T$ .

Consequently, a plot of  $\alpha(T)$  versus temperature was constructed and used to calculate the  $T_m$  value by interpolating  $\alpha=0.5$ . The transition equilibrium  $K(T)$  was calculated at various temperatures by using the equation 2:

$$K(T) = \alpha(T) / ([C_T/n]^{n-1} [1-\alpha(T)]^n) \quad (2)$$

where  $n$  is the number of strands involved in the thermodynamic equilibrium and  $C_T$ , the sum of their concentrations. In the case of the Fc<sub>5</sub>- $\alpha$ -DNA/target solution,  $n=2$ . This equation is only available for non self-complementary duplexes. A van't Hoff plot of  $\ln(K(T))$  versus  $1/T$  was generated for duplex formation. The slope and intercept of the calculated line yielded to the enthalpy ( $\Delta H^\circ$ ) and the entropy ( $\Delta S^\circ$ ) respectively, according to the equation 3:

$$\ln(K(T)) = -(\Delta H^\circ/R) \cdot 1/T + \Delta S^\circ/R \quad (3)$$

where  $R$  is the gas constant ( $1.987 \text{ Cal K}^{-1} \text{ mol}^{-1}$ ) and  $T$  the temperature in Kelvin. The Gibbs free energy at  $298^\circ\text{K}$  ( $\Delta G^\circ_{298}$ ) was calculated according to the equation 4:

$$\Delta G^\circ_{298} = \Delta H^\circ - 298 \cdot \Delta S^\circ \quad (4)$$

The obtained data represent at least the average of minimum five independent experiments on duplex formations. The errors addressed on the thermodynamic data result from the standard deviation of the three experiments. Standard deviation calculated for  $T_m$  values are within  $\pm 0.5^\circ\text{C}$  and those of  $\Delta H^\circ$ ,  $\Delta S^\circ$  and  $\Delta G^\circ_{298}$  are within  $\pm 7\%$ . Values of  $\Delta S^\circ$  and  $\Delta H^\circ$  used for the calculation of  $\Delta G^\circ_{298}$  were gathered in Table S2.

**Table S2** Thermodynamic parameters of Fc<sub>5</sub>-α-DNAs **4a**, **4b** and **8** with complementary sequence **10** in comparison with PO α-DNA **9** and β-DNA **11**.

| Duplex       | <i>T<sub>m</sub></i> (°C) | $\Delta T_m$ | $\Delta T_m/Fc$ | $\Delta G_{298}$ (kCal mol <sup>-1</sup> ) | $\Delta H^\circ$ (kCal Mol <sup>-1</sup> ) | $\Delta S^\circ$ (Cal Mol <sup>-1</sup> T <sup>-1</sup> ) |
|--------------|---------------------------|--------------|-----------------|--------------------------------------------|--------------------------------------------|-----------------------------------------------------------|
| <b>9/10</b>  | 46.6 ± 0.4                | ---          | ---             | -13.9 ± 0.2                                | -78.7 (± 3.0)                              | -217 (± 9)                                                |
| <b>4a/10</b> | 48.4 ± 0.4                | +1.8         | +0.4            | -12.6 ± 0.3                                | -55.8 (± 3.2)                              | -145 (± 10)                                               |
| <b>4b/10</b> | 47.1 ± 0.2                | +0.5         | +0.1            | -12.7 ± 0.2                                | -60.1 (± 2.4)                              | -159 (± 7)                                                |
| <b>8/10</b>  | 45.0 ± 0.5                | -1.6         | -0.3            | -12.8 ± 0.6                                | -62.2 (± 3.3)                              | -166 (± 13)                                               |
| <b>11/10</b> | 43.1 ± 0.2                | -3.5*        |                 | -13.2 ± 0.1                                | -80.1 (± 2.7)                              | -224 (± 9)                                                |

\*  $\Delta T_m$  corresponds to 12 modifications of α to β nucleoside. Experiments were carried out at 1 μM concentration for each strand in 25mM sodium phosphate buffer, 250mM NaCl pH 6.4. Data are the mean values of minimum five experiments.

## Electrochemical characterization

**Electrochemical characterization and hybridization kinetics:** Standard characterization of the Fc<sub>5</sub>-α-DNAs electrochemical response has been achieved on a convention electrode device as described previously,<sup>3</sup> using an external reference electrode of Ag/AgCl, a gold working electrode (1.6 mm diameter) and a counter electrode of Pt, at a scan rate of 100 mV s<sup>-1</sup>. 50 μM solutions of Fc<sub>5</sub>-α-DNAs were used in a 25 mM sodium phosphate buffer, 250 mM NaClO<sub>4</sub>, pH 6.4 (Table S3).

**Table S3** Electrochemical characterization of the Fc<sub>5</sub>-α-DNAs (50 μM) on a conventional electrode device; reference electrode: Ag/AgCl, scan rate: 100 mV s<sup>-1</sup>.

| Fc <sub>5</sub> -α-DNA | $E_{1/2} \pm 10$ (mV) | $E_{pa}$ (mV) | $E_{pc}$ (mV) | $\Delta E_p$ (mV) |
|------------------------|-----------------------|---------------|---------------|-------------------|
| <b>4a</b>              | 226                   | 228           | 223           | 5                 |
| <b>4b</b>              | 200                   | 222           | 178           | 44                |
| <b>8</b>               | 253                   | 256           | 249           | 7                 |

### Hybridization experiments:

Hybridization tests were carried out by introducing the target in the droplet. Electrochemical response was followed by CV before and after the target addition (scan rate: 100 mV s<sup>-1</sup>; potential range: -300 mV/+300 mV). [Fc<sub>5</sub>-α-DNA]=10 μM and [target]=55 μM (5.5 eq).

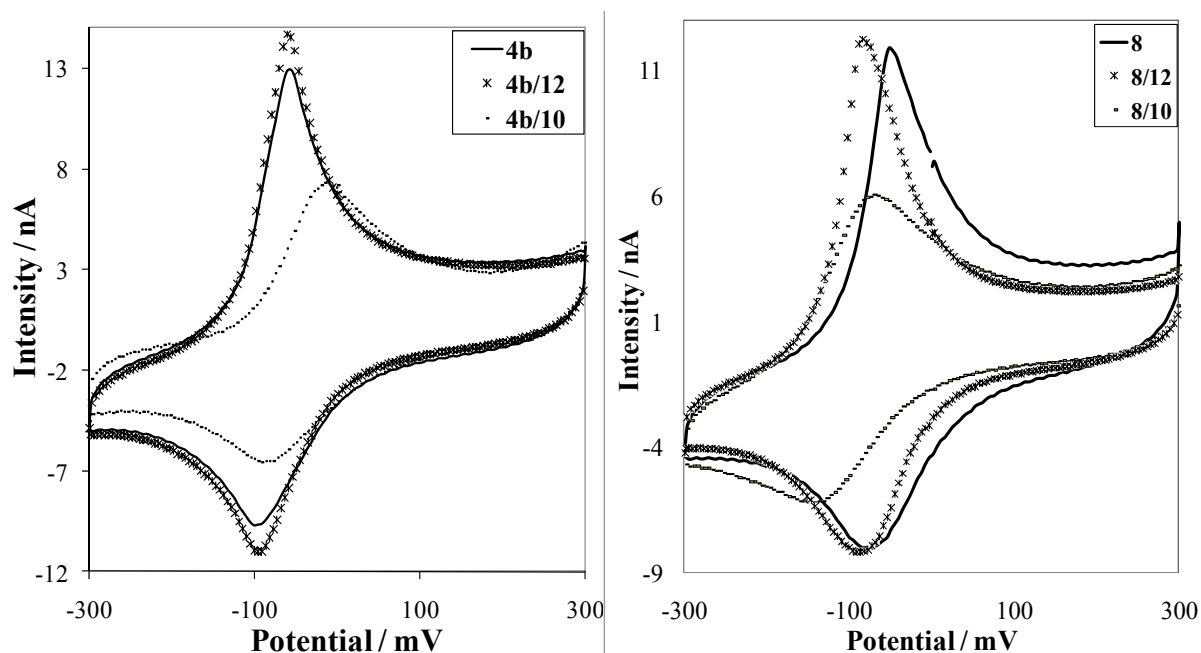

**Fig. S3** CV of Fc<sub>5</sub>-α-DNA **4b** or **8** alone (solid line), with non complementary **12** (\*) and complementary **10** (-) sequences. Experiments were carried out in 10 μL of 25 mM sodium phosphate buffer, 250 mM NaClO<sub>4</sub>, pH 6.4 with a 10 μM concentration of Fc<sub>5</sub>-α-DNA **4b** or **8**, and 5.5 eq of targets **10** or **12**. Scan rate: 100 mV s<sup>-1</sup>.

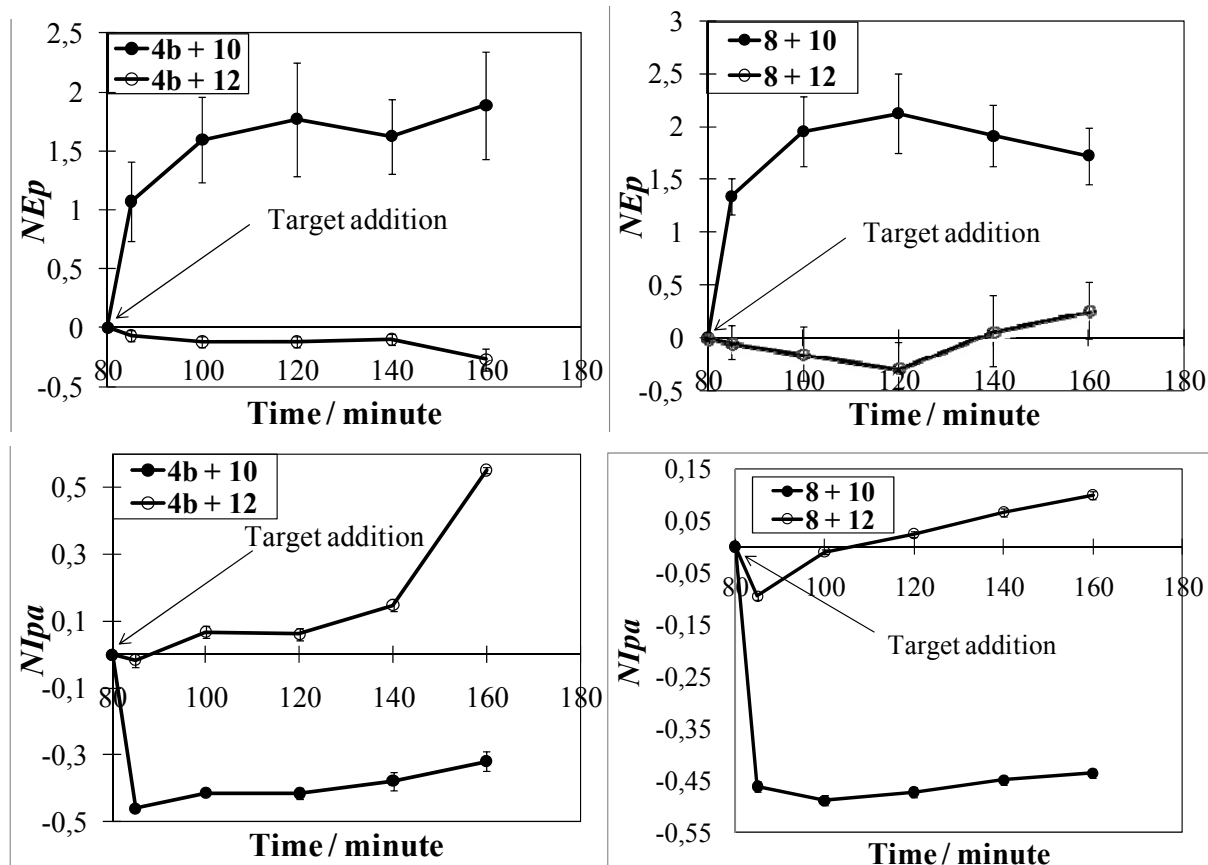

**Fig. S4** Evolution of the  $NEp$  and the  $NIpa$  of **4b** and **8** by CV after the addition of the complementary **10** or the non complementary **12** in the solution. Experiments were carried out in 10  $\mu\text{L}$  of 25 mM sodium phosphate buffer, 250 mM  $\text{NaClO}_4$ , pH 6.4 with a 10  $\mu\text{M}$  concentration of  $\text{Fc}_5\text{-}\alpha\text{-DNA}$  **4b** or **8** and 5.5 eq of **10** or **12**. Scan rate: 100  $\text{mV s}^{-1}$ .

It is worth noting that the addition of the non complementary target slightly decreased  $NEp$  and increase  $NIpa$  of **4b** and **8** responses, probably due to an electrostatic effect of the negatively charged target on probes adsorbed on the electrode, after introduction in the medium. This phenomenon was previously reported with ferrocenyl-stem-loop oligonucleotides, in the same conditions.<sup>4</sup>

#### Progressive addition of the target **10**:

To determine the sensitivity range of our system, a hybridization experiment was carried out with an increasing concentration of **10**, from 0 to 88  $\mu\text{M}$ , at a constant probe concentration of 10  $\mu\text{M}$ . This experiment was achieved to see how the  $\Delta Ep$  parameter evolved with a variation of the complementary target concentration in the solution (Fig. S5).

10  $\mu\text{L}$  droplet of the probe in sodium phosphate buffer (25 mM)/ $\text{NaClO}_4$  (250 mM)/pH 6.4 were deposited on the biochip's working area. The system was left for stabilization during 80 min. 0.3  $\mu\text{L}$  of target **10** solutions at different concentrations was successively added in the solution. CVs were recorded at 5 min, 20 min, and 40 min after the target addition. The values at 40 min that corresponded to a stable response of the system were represented on Fig. S5 for  $\text{Fc}_5\text{-}\alpha\text{-DNAs}$  **4a**, **4b** and **8**.

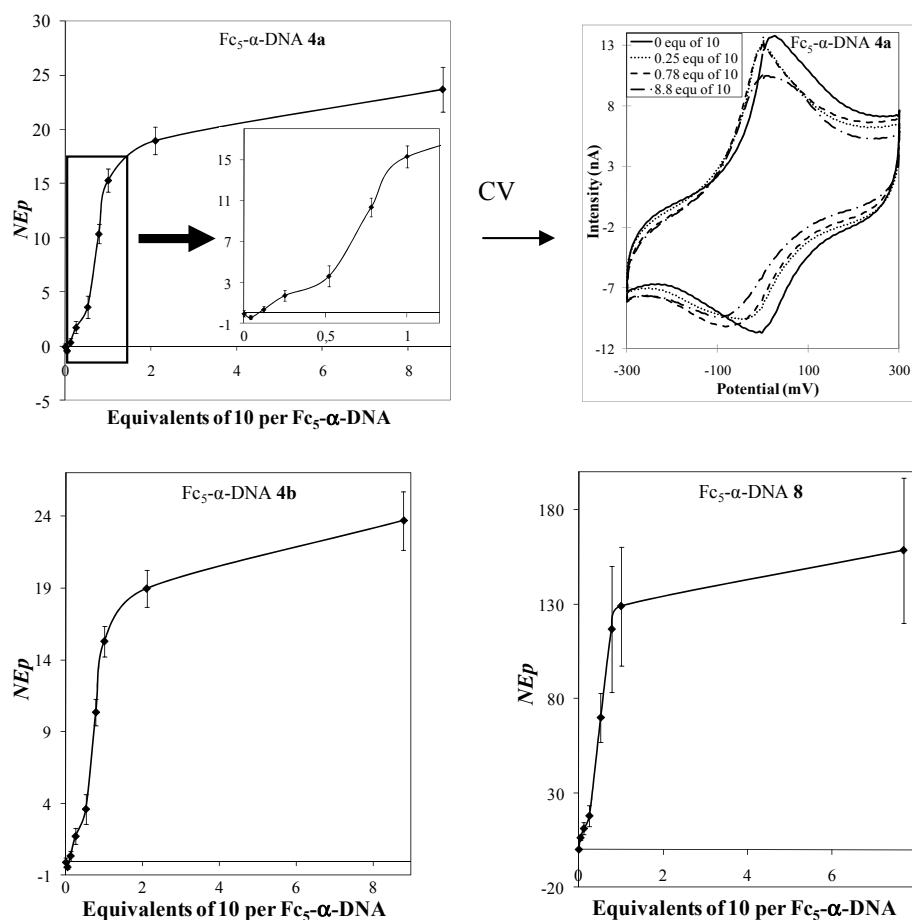

**Fig. S5** Evolution of the  $NEp$  of  $Fc_5\text{-}\alpha\text{-DNAs}$  **4a**, **4b** and **8** by CV after successive additions of target **10** from 0 to 8.8 equivalents. Experiments were carried out in 10  $\mu\text{L}$  of sodium phosphate buffer (25 mM)/ $\text{NaClO}_4$  (250 mM)/pH 6.4 with a 10  $\mu\text{M}$  concentration of  $Fc_5\text{-}\alpha\text{-DNAs}$ . Scan rate: 100  $\text{mV s}^{-1}$

The maximum variation was recorded after an addition of 2.1 eq of **10**. Moreover, the response was considered to be significant for a  $\Delta Ep$  variation higher than 10% of the value reached at the plateau. A minimum concentration of 2.5  $\mu\text{M}$  (0.25 equivalents) of **10** was detected for  $Fc_5\text{-}\alpha\text{-DNA}$  **4a** at 10  $\mu\text{M}$ . The same detection threshold was obtained for  $Fc_5\text{-}\alpha\text{-DNAs}$  **4b** and **8**. A quantitative determination of the **10** can be measured between 0.25 and 2.1 eq of the electrochemical probe. The presence of two species involved, binding and non-binding was not observed by CV. Only global oxidation and reduction waves were recorded during the experiment (see CV for **4a** on the top right).

1. L. A. Marky and K. J. Breslauer, *Biopolymers*, 1987, **26**, 1601-1620.
2. M. Durand, K. Chevrie, M. Chassignol, N. T. Thuong and J. C. Mauriziot, *Nucleic Acids Res.*, 1990, **18**, 6353-6359.
3. C. Farre, N. Spinelli, A. Bouchet, C. Marquette, B. Mandrand, F. Garnier and C. Chaix, *Synth. Met.*, 2007, **157**, 125-133.
4. G. Chatelain, H. Brisset and C. Chaix, *New J. Chem.*, 2009, **33**, 1139-1147.
